# Supplementary material
Source: publisher figshare collection journal article supplement (https://acs.figshare.com/ndownloader/files/4756255)
Supplement: Supplementary file 1 [file 4756255]

Supporting Information for:

**SIMULATIONS OF A PROTEIN TRANSLOCATION PORE: SECY**

*Shozeb Haider , Benjamin A. Hall, and Mark S.P. Sansom*

Figure S1

Comparison of **A** RMSF profile (from MD simulation of SecY in a bilayer) and **B** calculated B-value profile from a Gaussian network model analysis (1) of SecY. It can be seen that the two methods predict very similar profiles of residue-by-residue flexibility.

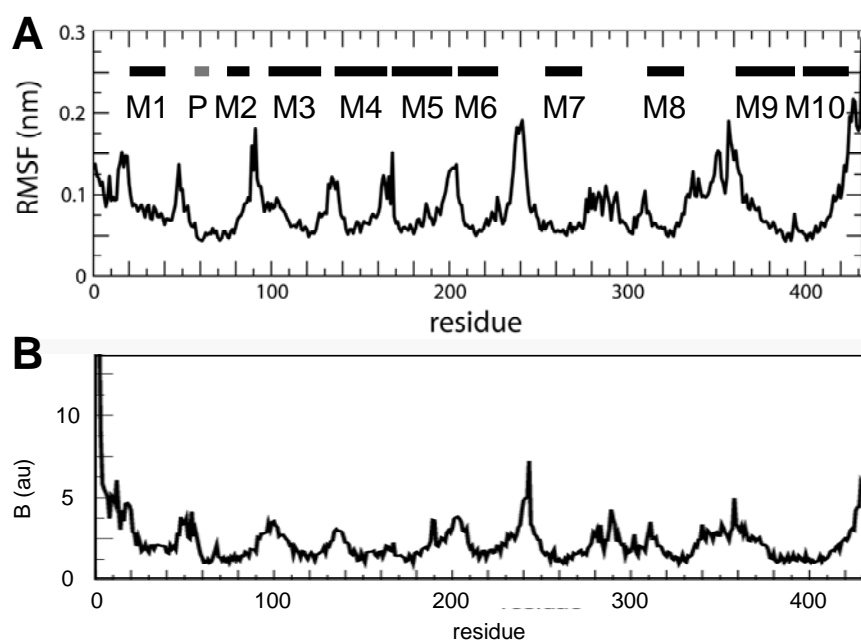

- (1) Keskin, O., Jernigan, R. L., and Bahar, I. (2000) Proteins with similar architecture exhibit similar large-scale dynamic behavior. *Biophys. J.* 78, 2093-2106.
